# Supplementary material for: In-plane CrI2/CrI3 2D superlattices: novel electronic properties and strain induced phase transition
Source: Royal Society of Chemistry journal article supplement (doi:10.1039/d2cp03059d), 2022-01-01
Supplement: d2cp03059d1.pdf [file d2cp03059d1.pdf]

## Supporting Information

### In-plane CrI<sub>2</sub>/CrI<sub>3</sub> 2D superlattice: novel electronic properties and strain induced phase transition

Yuanyuan Zhao<sup>1</sup>, Hongsheng Liu<sup>1,2\*</sup>, Jijun Zhao<sup>1</sup>, Junfeng Gao<sup>1,2\*</sup>

*1 Key Laboratory of Materials Modification by Laser, Ion and Electron Beams (Dalian University of Technology), Ministry of Education, Dalian 116024, China*

*2 Dalian University of Technology and Belarusian State University Joint Institute & Innovation Center, Dalian 116024, China*

Corresponding authors: [liuhongsheng@dlut.edu.cn](mailto:liuhongsheng@dlut.edu.cn), [gaojf@dlut.edu.cn](mailto:gaojf@dlut.edu.cn)

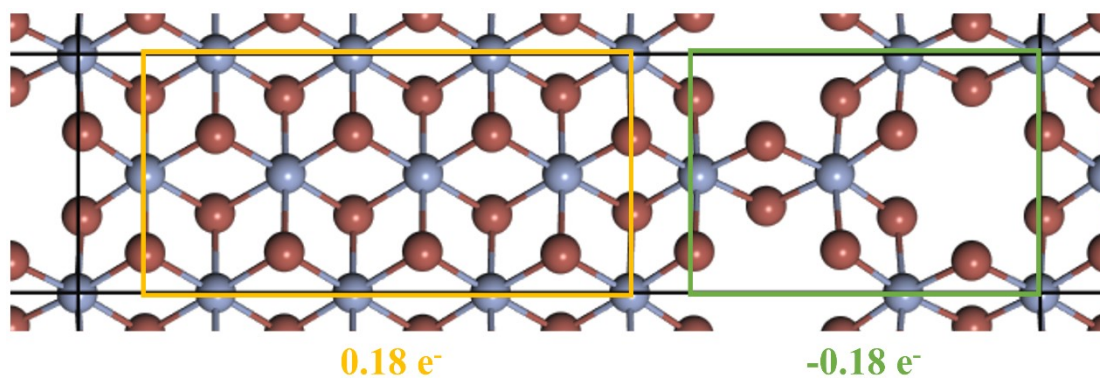

**Figure S1.** Bader charge transfer in CrI<sub>2</sub>(4)/CrI<sub>3</sub>(1) superlattice. Areas in the orange and green rectangles are CrI<sub>2</sub> and CrI<sub>3</sub> parts, respectively. Negative value means the gain of electrons and positive value means loss of electrons. Accordingly, 0.18 electron transfers from the CrI<sub>2</sub> part to the CrI<sub>3</sub> part.

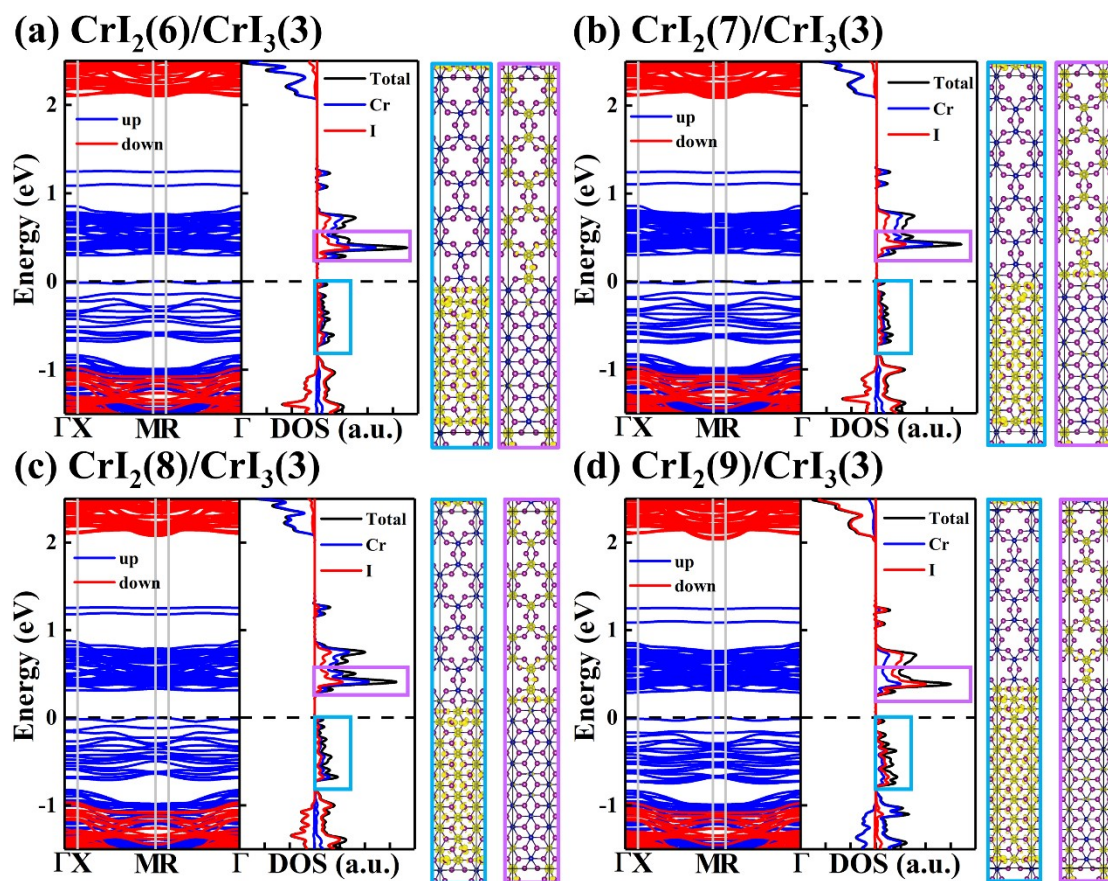

**Figure S2.** Electronic band structures, projected density of states and band decomposed charge densities of (a)  $\text{CrI}_2(6)/\text{CrI}_3(3)$ , (b)  $\text{CrI}_2(7)/\text{CrI}_3(3)$ , (c)  $\text{CrI}_2(8)/\text{CrI}_3(3)$ , (d)  $\text{CrI}_2(9)/\text{CrI}_3(3)$ . The Fermi level is scaled to zero. The charge density in blue and purple rectangles are from the bands indicated by blue and purple rectangles in the PDOS, respectively. The charge density isosurface is  $0.005 \text{ e}/\text{\AA}^3$ .

## CrI<sub>2</sub>(11)/CrI<sub>3</sub>(3)

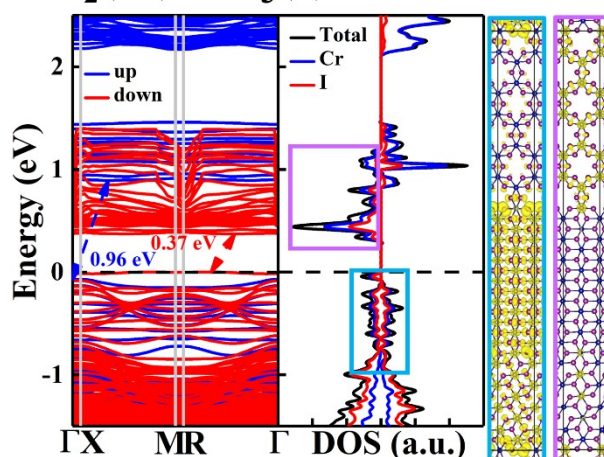

**Figure S3.** Electronic band structures, projected density of states and band decomposed charge densities of CrI<sub>2</sub>(11)/CrI<sub>3</sub>(3). The Fermi level is scaled to zero. The charge density in blue and purple rectangles are from the bands indicated by blue and purple rectangles in the PDOS, respectively. The charge density isosurface is 0.005 e/Å<sup>3</sup>.

### (a) CrI<sub>2</sub>(4)/CrI<sub>3</sub>(2)

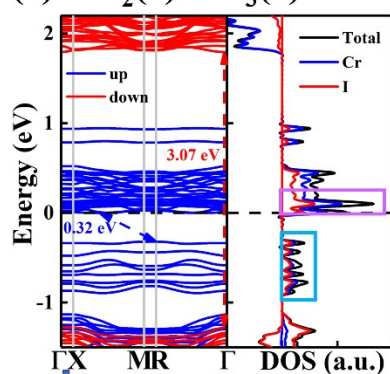

### (b) CrI<sub>2</sub>(4)/CrI<sub>3</sub>(4)

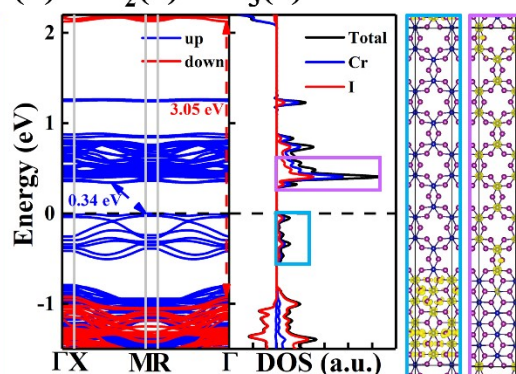

**Figure S4.** Electronic band structures, projected density of states and band decomposed charge densities of (a) CrI<sub>2</sub>(4)/CrI<sub>3</sub>(2), (b) CrI<sub>2</sub>(4)/CrI<sub>3</sub>(4). The Fermi level is scaled to zero. The charge density in blue and purple rectangles are from the bands indicated by blue and purple rectangles in the PDOS, respectively. The charge density isosurface is 0.005 e/Å<sup>3</sup>.

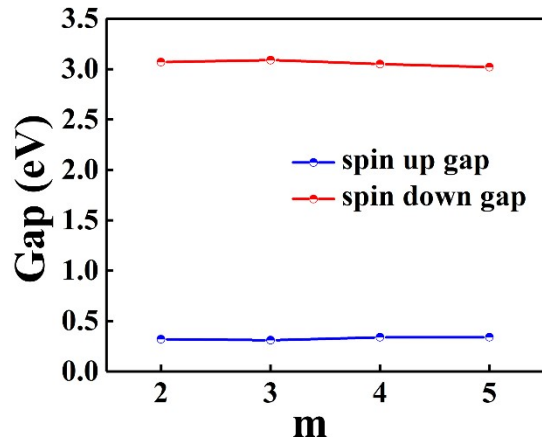

**Figure S5.** Band gap as a function of the width of CrI<sub>3</sub> ribbon in CrI<sub>2</sub>(4)/CrI<sub>3</sub>(m) superlattices.

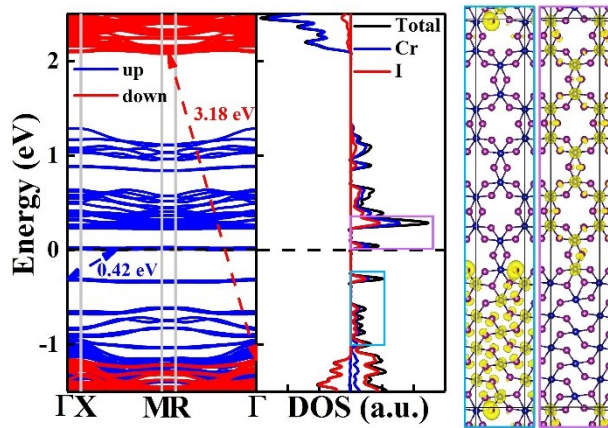

**Figure S6.** Electronic band structure, projected density of states and band decomposed charge densities of CrI<sub>2</sub>(4)/CrI<sub>3</sub>(3) superlattice under tensile strain of 6%. The Fermi level is set to zero. The charge density in blue and purple rectangles are from the bands indicated by blue and purple rectangles in the PDOS, respectively. The charge density isosurface is 0.005 e/Å<sup>3</sup>.
